# Supplementary material for: S-Locus Genotyping in Japanese Plum by High Throughput Sequencing Using a Synthetic S-Loci Reference Sequence
Source: Int J Mol Sci. 2023 Feb 15;24(4):3932. doi: 10.3390/ijms24043932 (PMC9960950; doi:10.3390/ijms24043932)
Supplement: Supplementary file 1 [file ijms-24-03932-s001.zip › Table_S1_R1.xlsx]

## Sheet: Sheet1
Table S1. List of the Prunus salicina accessionss used in this study, with data on the presumed geographical origin.
SRA acc. no.	Cultivar name	Species	Geographical category	Reference
SRS8254730	'Wanshuhuanai'	P. salicina	China: Fujian Province	[72]
SRS8254729	'Cuipinwannai'	P. salicina	China: Fujian Province	[72]
SRS8254676	'Changlixiangjiaoli'	P. simonii	China: Hebei Province	[72]
SRS8254693	'Changlixiangbian'	P. simonii	China: Hebei Province	[72]
SRS8254699	'Xingyikongxinli'	P. salicina	China: Guizhou Province	[72]
SRS8254710	'Tiankanmali'	P. salicina	China: Sichuan Province	[72]
SRS8254720	'Jinshali'	P. salicina	China: Yunnan Province	[72]
SRS8254726	'Cehengjixueli'	P. salicina	China: Guizhou Province	[72]
SRS8254727	'Abazhoumeiguili'	P. salicina	China: Sichuan Province	[72]
SRS8254728	'Huahongli'	P. salicina	China: Yunnan Province	[72]
SRS8254731	'Zhenyuanqiyuexiang'	P. salicina	China: Guizhou Province	[72]
SRS8254732	'Zhushali'	P. salicina	China: Yunnan Province	[72]
SRS8254668	'Cuihongli'	P. salicina	China: Sichuan Province	[72]
SRS8254670	'Yanzhili'	P. salicina	China: Fujian Province	[72]
SRS8254669	'Fujianfurongli'	P. salicina	China: Fujian Province	[72]
SRS8254671	'Damili'	P. salicina	China: Guangdong Province	[72]
SRS8254672	'Changkuangsanhuali'	P. salicina	China: Guangdong Province	[72]
SRS8254673	'Heyuansanhuali'	P. salicina	China: Guangdong Province	[72]
SRS8254674	'Tongkeli'	P. salicina	China: Guangxi Province	[72]
SRS8254675	'Kuaishili'	P. salicina	China: Guangdong Province	[72]
SRS8254678	'Saozouli'	P. salicina	China: Guangxi Province	[72]
SRS8254677	'Shuili'	P. salicina	China: Guangxi Province	[72]
SRS8254679	'Qingpihongxin'	P. salicina	China: Guangdong Province	[72]
SRS8254680	'Tianmumili'	P. salicina	China: Zhejiang Province	[72]
SRS8277978	'Fenghuali'	P. salicina	China: Zhejiang Province	[72]
SRR13742225	'Zaohuangli'	P. salicina	China: Anhui Province	[72]
SRS8254681	'Hongxinli'	P. salicina	China: Anhui Province	[72]
SRS8254683	'Huangguli'	P. salicina	China: Zhejiang Province	[72]
SRS8254685	Zuili'	P. salicina	China: Zhejiang Province	[72]
SRS8254684	'Lushanli'	P. salicina	China: Jiangxi Province	[72]
SRS8254682	'Jinganzhushali'	P. salicina	China: Jiangxi Province	[72]
SRS8254686	'Jaiqingzi'	P. salicina	China: Jiangsu Province	[72]
SRS8254687	'Dahuili'	P. salicina	China: Henan Province	[72]
SRS8254688	'Zhengzhouzaoli'	P. salicina	China: Henan Province	[72]
SRS8254690	'Fulihong'	P. salicina	China: Shaanxi Province	[72]
SRS8254689	'Yuhuangli'	P. salicina	China: Shaanxi Province	[72]
SRS8254692	'Daqingke'	P. salicina	China: Shandong Province	[72]
SRS8254691	'Pingdingxiang'	P. salicina	China: Shandong Province	[72]
SRS8254696	'Huangli'	P. salicina	China: Shandong Province	[72]
SRS8254694	'Wuxiangli'	P. salicina	China: Hebei Province	[72]
SRS8254695	'Lihe'	P. salicina	China: Hebei Province	[72]
SRS8254697	'Jinxiqiuli'	P. salicina	China: Liaoning Province	[72]
SRS8254698	'Qiyuexiang'	P. salicina	China: Liaoning Province	[72]
SRS8254700	'Pingguoli'	P. salicina	China: Liaoning Province	[72]
SRS8254704	'Satsuma'	P. salicina	USA: California	[72]
SRS8254703	'Brace'	P. salicina	USA: California	[72]
SRS8254702	'Bullbank'	P. salicina	USA: California	[72]
SRS8254701	'Santa Rosa'	P. salicina	USA: California	[72]
SRS8254705	'Angeleno'	P. salicina	USA: California	[72]
SRS8254706	'Beauty'	P. salicina	USA: California	[72]
SRS8254707	'Fortune'	P. salicina	USA: California	[72]
SRS8254717	'Friar'	P. salicina	USA: California	[72]
SRS8254708	'Dashizaosheng'	P. salicina	Japan	[72]
SRS8254709	'Zaoshengyueguang'	P. salicina	Japan	[72]
SRS8254712	'Qiuji'	P. salicina	Japan	[72]
SRS8254711	'Yuanshuai'	P. salicina	Japan	[72]
SRS8254713	'Hongshou'	P. salicina	Japan	[72]
SRS8254714	'Guiyang'	P. salicina	Japan	[72]
SRS8254715	'Dashizhongsheng'	P. salicina	Japan	[72]
SRS8254716	'Jingshang'	P. salicina	Japan	[72]
SRS8254719	'Guofeng2'	P. salicina	China: Liaoning Province	[72]
SRS8254718	'Guofeng7'	P. salicina	China: Liaoning Province	[72]
SRS8254723	'Guofeng17'	P. salicina	China: Liaoning Province	[72]
SRS8254721	'Guomei'	P. salicina	China: Liaoning Province	[72]
SRS8254722	'Guoli'	P. salicina	China: Liaoning Province	[72]
SRS8254725	'Xiangjiaoli'	P. salicina	China: Liaoning Province	[72]
SRS8254724	'Qiuxiang'	P. salicina	China: Liaoning Province	[72]
SRR8303524	Ni Ma Qu Ji Li	P. salicina	China	[87]
SRR13627323	Wushan plum	P. salicina	China: Chongging Province	[88]
SRR12596756	Non-specified	P. salicina	China: Tibet Province	[89]
SRR12283416	Li He	P. salicina	China	[90]
SRR17477716	Sanhua plum	P. salicina	China: Guangdong Province	[91]
SRR17477883	Wanshuang plum	P. salicina	China: Chongging Province	[91]
SRR17478140	Wuyuecui	P. salicina	China: Sichuan Province	[91]
SRR17478141	Oishiwase	P. salicina	Japan	[91]
SRR17478256	Yinhong plum	P. salicina	China: Sichuan Province	[91]
SRR17480297	Cuihong plum	P. salicina	China: Sichuan Province	[91]
SRR17480298	Fengtang plum	P. salicina	China: Guizhou Province	[91]
SRR17498228	N2 Guofeng	P. salicina	China: Liaoning Province	[91]
SRR14477882	Zhongly nº 6	P. salicina	China: North	[74]
ERR5535908	C20	P. salicina var. cordata	Spain	[92]
ERR5535909	C46	P. salicina var. cordata	Spain	[93]
SRR12364717	Sanyueli	P. salicina	China: Guangdong Province	[94]
SRR10235678	Sanyueli	P. salicina	China: Guangdong Province	[73]
DRR212561	Honeyrosa	P. salicina	Japan	[95]
DRR212562	Oishiwase	P. salicina	Japan	[95]
DRR212563	Sordum	P. salicina	Japan	[95]
DRR212564	Taiyo	P. salicina	Japan	[95]
