# Supplementary material for: S-Locus Genotyping in Japanese Plum by High Throughput Sequencing Using a Synthetic S-Loci Reference Sequence
Source: Int J Mol Sci. 2023 Feb 15;24(4):3932. doi: 10.3390/ijms24043932 (PMC9960950; doi:10.3390/ijms24043932)
Supplement: Supplementary file 1 [file ijms-24-03932-s001.zip › Table_S2.xlsx]

## Sheet: Table S2
Table S2. Areas under the probability density curves for each gene within the syhthetic reference sequence and for all accessions analysed in this study. Areas corresponding to final positive calls -in agreement with visual inspection and breadth of gene coverage- are highlighted in yellow
	SRA acc. no.	SRS8254730	SRS8254729	SRS8254676	SRS8254693	SRS8254699	SRS8254710	SRS8254720	SRS8254726	SRS8254727	SRS8254728	SRS8254731	SRS8254732	SRS8254668	SRS8254670	SRS8254669	SRS8254671	SRS8254672	SRS8254673	SRS8254674	SRS8254675	SRS8254678	SRS8254677	SRS8254679	SRS8254680	SRS8277978	SRR13742225	SRS8254681	SRS8254683	SRS8254685	SRS8254684	SRS8254682	SRS8254686	SRS8254687	SRS8254688	SRS8254690	SRS8254689	SRS8254692	SRS8254691	SRS8254696	SRS8254694	SRS8254695	SRS8254697	SRS8254698	SRS8254700	SRS8254704	SRS8254703	SRS8254702	SRS8254701
	Cultivar name	'Wanshuhuanai'	'Cuipinwannai'	'Changlixiangjiaoli'	'Changlixiangbian'	'Xingyikongxinli'	'Tiankanmali'	'Jinshali'	'Cehengjixueli'	'Abazhoumeiguili'	'Huahongli'	'Zhenyuanqiyuexiang'	'Zhushali'	'Cuihongli'	'Yanzhili'	'Fujianfurongli'	'Damili'	'Changkuangsanhuali'	'Heyuansanhuali'	'Tongkeli'	'Kuaishili'	'Saozouli'	'Shuili'	'Qingpihongxin'	'Tianmumili'	'Fenghuali'	'Zaohuangli'	'Hongxinli'	'Huangguli'	'Zuili'	'Lushanli'	'Jinganzhushali'	'Jaiqingzi'	'Dahuili'	'Zhengzhouzaoli'	'Fulihong'	'Yuhuangli'	'Daqingke'	'Pingdingxiang'	'Huangli'	'Wuxiangli'	'Lihe'	'Jinxiqiuli'	'Qiyuexiang'	'Pingguoli'	'Satsuma'	'Brace'	'Bullbank'	'Santa Rosa'
	Library	G	G	G	G	G	G	G	G	G	G	G	G	G	G	G	G	G	G	G	G	G	G	G	G	G	G	G	G	G	G	G	G	G	G	G	G	G	G	G	G	G	G	G	G	G	G	G	G
Gene in the synthetic reference sequence	SFBa	9.62992	5.25051	5.26704	5.59899	4.25022	1.26844	5.26803	7.35346	4.19448	5.10868	4.16226	11.1366	4.40321	4.88438	4.83933	1.6425	8.53342	4.40878	11.6501	12.5469	10.0273	5.55079	4.7175	1.26972	5.27165	4.88625	6.81005	6.81857	4.21077	5.65808	4.65903	4.73042	5.09507	8.8308	4.79955	6.88007	1.42676	6.82962	6.88007	5.53439	7.39601	5.93779	5.89006	11.2162	5.45421	5.07341	1.36794	0.766337
	Sa-RNase	10.8741	5.92889	5.94755	6.3224	4.79936	1.43232	5.94868	8.30356	4.73643	5.76874	4.70003	12.5755	4.97212	5.51546	5.46459	1.85471	9.63597	4.97841	13.1554	14.168	11.3229	6.26798	5.32702	1.43377	5.95276	5.51758	7.68993	7.69955	4.75482	6.8449e-16	5.26099	5.34161	5.75337	9.97177	5.41967	7.769	1.6111	7.71203	7.769	6.24945	8.3516	6.70498	6.65108	12.6654	6.15891	5.72891	1.54468	0.86535
	SFBb	9.83445	11.1622	5.3789	5.71791	4.34049	1.29538	5.37992	7.50964	8.91689	10.8607	8.84864	11.3732	4.49673	10.3838	10.2881	1.8421e-16	8.71466	9.37271	11.8976	12.8134	10.2403	5.66869	10.0291	1.29669	5.38361	10.342	6.95469	6.96339	1.9567e-17	0.0388413	9.90482	10.0565	5.20328	9.01836	4.90149	7.0262	0.079184	6.97468	7.0262	5.65193	7.55309	6.0639	6.01516	11.4545	5.57005	10.7858	1.39699	0.782613
	Sb-RNase	13.9311	22.5566	7.89271	7.02801	5.89716	8.54652	7.49655	9.65854	18.0192	21.9472	17.8813	13.4674	6.55527	20.9836	20.7901	10.6804	12.227	18.9403	15.6249	17.0087	13.459	7.59266	20.2668	5.78786	8.28027	20.865	9.46384	8.38259	7.38183	13.3485	20.0156	20.3222	7.70049	11.4846	6.58645	9.99462	5.2515	9.17023	9.99462	6.20346	10.1024	8.17352	7.83442	15.7048	7.24297	21.7958	8.10781	4.05111
	SFBc	0.123784	0.0929043	0.0697373	0.0702822	0.0673478	0.129479	0.0860092	0.0908786	0.0696578	0.0852333	0.238127	0.174444	0.055214	0.0878638	0.0805547	0.150608	0.104151	0.0780325	0.14687	0.212804	0.133239	0.0689557	0.0808563	0.0791661	0.106978	0.0562527	0.0821149	0.0777066	0.0962901	0.21365	0.0729286	0.0767856	0.0670032	0.115832	10.0564	0.082444	0.0758241	0.106147	0.082444	0.0616763	0.105684	0.0718116	0.0752614	0.139947	0.0638143	0.0803934	0.0803539	8.96678
	Sc-RNase	2.39763	1.03792	1.7901	0.666917	1.2317	1.81706	1.50931	1.07932	0.612903	1.06642	1.31359	2.60844	0.883391	0.965785	1.34856	3.09505	2.1578	1.6514	2.64434	2.77643	1.67886	1.33099	0.845743	1.26651	1.15436	1.37725	1.78626	1.22993	1.06554	2.29193	1.31544	1.12656	1.19497	2.80117	17.2826	1.86849	1.56315	1.35949	1.86849	0.566731	1.80009	1.28266	1.15083	2.04419	1.70394	1.35775	2.33609	15.4418
	SFBd	5.73989e-18	2.39797e-16	1.72412e-16	7.05546e-17	1.48048e-16	1.49191e-16	6.69508e-17	8.06975e-17	6.50579	2.82121e-18	1.85775e-16	1.12899e-16	1.26371e-16	2.1593e-18	5.91253e-17	2.70402e-16	2.30158e-17	1.75872e-16	4.62048e-17	0	4.31559e-17	1.40388e-16	1.16382e-16	1.66745e-16	8.36117	1.36114e-19	9.92988e-17	2.37308e-16	6.29274e-20	1.18432e-16	2.22733e-16	3.73887e-18	3.59949e-17	0	2.90624e-17	1.07258e-16	8.63266e-17	0	1.07258e-16	8.35891e-17	6.03816e-17	1.5872e-16	2.41893e-16	4.93275e-17	7.14139e-17	1.37594e-16	1.29041e-16	1.28235e-16
	Sd-RNase	2.78041	1.76288	1.66006	1.50413	1.29462	2.64764	1.66523	2.95446	14.0376	1.28261	1.31094	3.345	0.98565	1.36115	1.45699	2.13096	2.51213	1.27951	3.20838	5.17471	2.7603	1.43435	1.28681	1.60352	17.339	1.32467	1.81449	1.52483	2.06288	3.38731	1.63042	1.52775	1.28439	2.1977	1.13914	1.85965	1.63388	1.9361	1.85965	1.22467	1.9473	1.61615	1.57267	2.88147	1.58108	1.56817	2.34267	0.998203
	SFBe	0	4.82445e-17	10.499	11.181	8.53957	1.51467e-17	6.52576e-16	2.33039e-16	3.84361e-19	1.70335e-17	2.68345e-16	3.68796e-17	2.26341e-16	1.16846e-16	3.93236e-17	8.65125e-18	1.92595e-16	1.06552e-16	1.17063e-16	5.14988e-17	1.50369e-16	11.6159	4.9293e-17	14.2388	3.60417e-17	3.93869e-17	14.1098	13.8816	4.5211e-17	0.527747	4.38433e-18	1.6468e-17	10.7428	1.72937e-16	0	0	10.8266	1.37747e-16	0	11.426	1.65126e-16	12.3169	12.3777	7.18302e-17	2.1523e-16	1.54999e-17	9.08896e-17	8.69156
	Se-RNase	4.32486	2.18602	21.915	23.4371	17.0709	2.8354	2.12342	3.11498	1.8931	2.07049	1.87861	4.74064	1.82406	2.4115	2.2377	4.45472	4.04446	1.998	4.89497	6.06125	4.38242	23.2305	1.93803	28.6262	2.35611	2.07034	28.5239	28.4193	3.54325	6.95133	1.98267	2.22219	21.2731	4.17717	2.16093	3.82469	23.03	3.49358	3.82469	23.0106	2.99648	24.898	24.7175	5.25117	4.86504	2.03752	3.95995	18.0943
	SFBf	0	9.7e-18	0	0	8.75326e-17	5.09685e-20	8.4928	8.22696	0	0	6.61807	0	6.9554e-17	0	0	0	1.76959e-22	0	0	3.64353e-17	0	4.61315e-17	0	0	0	0	0	6.48415e-17	9.74017e-17	1.21927e-17	0	0	5.39487e-17	8.1771e-18	0	0	0	7.4546e-18	0	0	0	0	0	1.03321e-18	8.83888	0	3.51483e-18	0
	Sf-RNase	0.463495	0.279989	0.263291	0.529758	0.415945	0.413385	14.1453	11.8377	0.192842	0.83707	11.0793	0.968279	0.219465	0.224493	0.258047	0.531005	0.823827	0.235057	0.561858	1.09416	0.465184	0.316724	0.633943	0.391609	0.282841	0.231452	0.341216	0.341437	0.641369	1.25553	0.23133	0.243519	0.574677	0.438825	0.22267	0.357312	0.262893	0.340092	0.357312	0.287482	0.383974	0.2961	0.284018	0.519678	14.4089	0.261232	0.369043	0.231576
	SFBg	6.74249e-16	4.0037e-16	0	3.43721e-19	0	2.10455e-16	9.5813	4.77082	1.50734e-16	2.70633e-16	2.53027e-16	5.55462e-17	2.86563e-16	5.22617e-16	2.06467e-16	2.8632e-16	7.28186e-17	6.75676e-16	1.10178e-16	5.31317e-19	8.84492e-17	0	6.2776e-16	7.548e-17	9.39971	5.56344e-16	0	1.71712e-19	6.12246e-17	8.75692e-17	4.81549e-16	5.96865e-16	0	4.10467e-17	2.30646e-16	2.9931	2.42657	2.25856	2.9931	0	3.0102	0	1.83388e-19	1.96414e-16	2.32718e-16	2.26743e-16	6.1092e-17	1.84692e-17
	Sg-RNase	0.357444	0.212797	7.76874e-17	3.10904e-16	0.165805	2.909e-16	13.9214	13.9382	4.36423e-17	3.01302e-17	2.55451e-16	5.06795e-16	1.42451e-16	4.18091e-16	0.231793	5.92034e-16	2.97179e-16	4.03247e-16	3.90944e-17	0.489565	0.447602	1.39801e-16	1.83779e-16	6.87326e-16	13.9175	3.38236e-16	3.24757e-16	4.20938e-16	5.01861e-16	4.77817e-16	4.67352e-16	0.287578	3.7594e-17	3.32467e-18	3.16066e-17	0.699387	4.86923e-16	0.248001	0.699387	0.216124	4.22534e-16	0.220722	3.7186e-16	2.93219e-16	1.11951e-17	1.40403e-16	2.20696e-16	0.216168
	SFBh	5.20304e-17	5.15475e-17	7.00085e-18	4.59099e-17	7.81358e-17	2.1572e-17	1.64814e-17	3.3521e-17	4.85563e-17	2.89313e-19	2.13784e-17	7.91971e-17	1.64907e-16	1.57528e-16	4.05628e-17	7.00967e-17	1.95714e-17	1.1202e-16	1.40806e-16	2.82333e-19	1.24586e-17	3.3658e-17	6.51905e-17	1.79809e-17	1.95215e-17	1.74515e-16	3.18414e-18	6.62829e-17	12.8551	0.503718	6.32953e-17	1.64949e-16	1.0344e-17	1.10331e-17	8.97321	0	1.34007e-16	7.05135e-18	0	1.71883e-17	0	1.36589e-17	6.13046e-17	1.07673e-17	10.2943	1.07464e-16	1.19494e-16	1.89004e-17
	Sh-RNase	1.53897e-16	0	1.83919e-16	4.02763e-16	0.157892	2.11428e-16	1.31471e-19	0.273244	0	4.24784e-17	8.22007e-17	1.52634e-16	8.75142e-17	0	3.9119e-17	3.56127e-17	4.16606e-16	0.170561	1.05409e-16	1.20227e-16	2.1326e-16	2.18618e-16	1.06781e-17	4.64723e-16	2.61332e-18	0	3.03793e-16	2.84808e-16	13.2844	1.24893e-17	0	3.19398e-17	1.55451e-16	1.65185e-16	9.3687	1.1497e-16	0	3.90298e-17	1.1497e-16	4.06513e-16	1.33322e-16	3.27517e-16	2.80639e-16	2.53749e-18	10.6346	2.82464e-17	1.16708e-16	1.90043e-16
	Si-RNase	0	0	0.160349	4.45234e-16	3.95313e-16	2.12879e-16	0	3.36245e-17	3.44999e-17	0	6.33303e-17	1.14789e-16	3.10384e-18	2.89576e-17	7.68788	0.249296	13.6895	3.63052e-18	2.41652e-16	0.354382	3.20669e-16	1.91056e-16	4.35204e-18	1.6727e-16	0.15985	6.56662e-17	1.26197e-17	0	1.3789e-16	4.18521e-17	0.171655	8.5893e-17	0.129284	0.240332	4.24286e-16	0.232732	0	3.90263e-17	0.232732	2.12133e-16	1.52133e-16	3.17652e-18	9.56126e-17	1.61024e-16	1.27044e-19	0	5.23679e-16	2.34739e-17
	Sj-RNase	3.71725	1.50893	0.547437	0.790464	0.900089	2.62039	1.68307	1.68045	1.00448	1.19524	0.391061	3.47773	1.3251	1.11576	0.65972	2.93402	1.5226	1.4619	2.40413	4.5458	2.27514	1.4548	0.61704	1.77294	0.89941	0.882146	0.861232	1.17863	1.28378	3.90369	0.626557	0.967307	1.79724	1.4743	1.37515	1.15123	1.38584	1.72768	1.15123	1.04975	1.20959	1.30223	1.53301	2.33385	1.27735	1.34588	0.669498	1.16889
	SFBk	1.30843e-16	3.87659e-18	9.22256	9.29795	7.28943	6.89421e-17	1.48673e-16	2.18171e-16	2.96454e-17	5.05201e-17	6.23366e-17	4.45678e-17	1.1529e-16	5.81723e-17	1.18097e-17	1.19978e-16	7.08688e-16	0	2.28845e-16	3.02974e-16	7.14386e-16	3.88521e-17	7.17775e-17	1.93449e-17	1.44028e-16	4.44446e-17	3.41235e-17	9.76297e-17	2.43075e-16	4.87979e-17	1.35387e-16	9.45744e-17	8.75612e-18	1.4177e-20	8.15139e-17	3.45125e-16	0	1.532e-16	3.45125e-16	9.51399	1.82904e-16	3.19391e-16	0	9.35175e-17	3.31734e-17	0	13.4073	0
	Sk-RNase	0.35739	2.58166e-17	8.7348	9.04625	6.67431	2.09802e-16	3.64724e-17	0	9.53317e-17	1.77694e-16	9.03412e-17	1.53261e-16	1.62765e-16	3.8522e-17	1.21534e-16	1.16478e-16	5.59079e-18	0.162439	4.9929e-17	1.51898e-16	8.97027e-17	3.12086e-16	7.86799e-17	3.78854e-16	1.38706e-17	2.63293e-18	3.32454e-16	4.13605e-16	4.07361e-16	1.39625e-16	2.0828e-16	4.9878e-18	2.67751e-17	1.56107e-16	2.03343e-16	0.255808	1.3317e-16	2.86314e-16	0.255808	9.49984	0.274874	4.1404e-16	2.99766e-16	3.14548e-16	2.86798e-16	9.07806e-18	13.3337	1.90009e-16
	Sl-RNase	5.46849	2.77599	2.45363	2.68334	4.15454	7.79775	3.06273	3.66148	1.91627	2.38104	1.90157	5.96183	2.33117	3.71839	2.46055	5.56384	5.20212	2.50968	11.9023	7.1568	10.2253	3.31191	2.61586	2.55828	2.90359	2.66428	3.55885	3.05423	3.51757	7.35407	2.18007	2.43998	3.13094	4.70131	2.08949	6.78184	2.3601	3.69686	6.78184	2.74779	7.47832	5.78107	6.73868	5.37614	3.22371	2.93605	4.62944	2.08155
	Sm-RNase	0.337006	1.03314e-16	1.43453e-17	1.54298e-16	1.21217e-16	1.61158e-16	6.59387e-17	1.04386e-16	0.154526	3.57632e-17	1.20075e-16	0.439287	1.08237e-16	7.81242e-17	6.49497e-17	4.66214e-16	2.71068e-16	1.39531e-16	6.69832e-16	2.29451e-16	5.0143e-16	6.30794e-16	1.60279e-16	2.99664e-16	0.193173	2.23303e-16	2.69886e-16	5.49042e-16	1.43187e-16	4.40871e-16	2.38214e-16	2.10131e-16	3.16077e-16	1.79994e-16	1.54635e-16	3.22175e-16	2.24775e-16	7.27098e-17	3.22175e-16	6.94803e-17	0.262371	6.18829e-16	5.27455e-16	2.51756e-16	9.63861e-17	3.0145e-17	1.56202e-17	1.11307e-16
	Sn-RNase	4.29235	1.97137	2.61889	1.61534	1.62508	2.92906	2.36444	3.40902	1.74824	1.98842	1.6293	4.26427	1.85918	1.11833	1.52308	3.79513	2.98124	2.03	4.59307	5.46455	3.82776	2.13657	2.44157	3.23302	2.04413	1.88995	2.88116	2.26265	2.35253	4.82723	1.67519	2.11779	2.61221	3.35115	1.62357	3.00653	1.89728	3.00482	3.00653	2.30215	2.75906	2.4985	1.85741	3.13019	2.21709	2.78888	4.00813	1.54565
	St-RNase	4.31207e-16	1.85003e-17	1.87114e-16	1.49899e-16	1.00487e-16	3.12293e-16	1.15759e-17	1.31821e-16	1.36496e-16	5.22981e-17	9.55683e-17	2.8307e-16	1.31934e-16	9.62384e-17	1.71529e-17	3.79244e-16	6.20685e-17	8.63847e-17	4.06154e-17	1.90028e-16	2.18903e-16	9.78346e-17	2.02151e-16	1.42463e-16	3.55766e-17	1.17079e-16	1.53285e-16	3.52131e-17	1.17195e-16	1.43646e-16	2.73755e-16	2.11393e-16	2.72126e-18	2.93055e-17	1.35677e-16	2.33441e-16	2.30061e-16	6.87596e-16	2.33441e-16	1.53693e-16	1.36339e-16	1.26384e-16	0	1.12229e-16	3.45555e-16	2.1398e-16	1.059e-16	1.32795e-16
	SFB7	4.86551e-16	1.03759e-16	1.07508e-16	4.66849e-17	1.4594e-16	0.821739	1.94816e-16	0	7.01886e-17	3.29497e-17	2.26616e-16	1.15005e-16	3.39007e-16	3.18603e-16	1.45626e-16	2.79243e-16	6.20918e-16	7.04688	2.36721e-16	3.2653e-17	5.77938e-17	5.17831e-17	7.48514	1.20304e-17	1.18894e-16	7.73711	2.2484e-17	0	10.7447	2.6355e-22	7.47489	7.19568	0	7.67167e-17	7.66894e-17	1.03678e-16	1.60309e-17	10.3975	1.03678e-16	1.00878e-16	3.53165e-16	0	3.34668e-17	9.02225e-17	0	1.68724e-16	3.291e-18	5.18013e-17
	S7-RNase	1.58317e-16	1.44794e-16	0	1.64803e-17	7.10859e-18	0	2.01903e-17	1.62971e-16	2.1045e-16	2.29348e-16	2.9911e-17	7.26132e-17	1.62969e-16	4.45887e-17	2.24234e-17	3.74718e-16	4.6461e-17	2.14292	3.50832e-17	7.12665e-17	7.84636e-18	7.63466e-18	2.27631	0	1.25082e-16	1.40483	2.25631e-17	8.07099e-17	3.38341	2.49921e-16	2.21655	2.12603	8.7905e-18	7.28711e-19	4.59208e-17	3.64272e-18	0	3.30937	3.64272e-18	4.85693e-18	6.37277e-17	4.97856e-18	0	4.26471e-17	1.79838e-17	1.98165e-16	2.85117e-17	0
	S8-RNase	6.05488	3.21939e-16	1.28844e-17	0	1.1298e-17	0	0	1.51714e-16	3.50926e-16	3.02522	2.59697e-16	6.96795e-17	3.47274e-16	1.11859e-16	6.34189e-17	5.0774e-17	9.48618e-17	4.19456e-17	2.55425e-16	2.57736e-17	3.82143e-17	5.20249e-17	1.11675e-16	1.78016e-18	8.87506e-18	3.15593e-17	1.56341e-20	0	1.12373e-16	8.31818e-18	5.11456e-17	1.10743e-17	1.97961e-16	1.19375e-16	5.92677e-17	3.38028e-17	2.342e-16	3.33112e-17	3.38028e-17	0	0	4.3044e-20	3.20518e-17	1.27061e-16	0	2.78423	5.01021	9.11431e-17
	S9-RNase	12.3744	0.538335	0.322522	0.343124	0.463997	1.02475	0.538185	0.748262	0.262682	0.297462	0.395821	1.27006	0.294485	0.62587	0.522691	1.12157	11.0066	0.451189	1.14769	1.30523	0.634044	0.538958	0.475086	0.661497	0.312831	0.504058	0.468607	0.709697	0.426025	0.903057	0.323485	0.284275	0.784615	0.556892	0.500038	0.434904	0.553859	0.41225	0.434904	0.802618	0.467259	0.386263	0.832095	1.18757	0.527082	0.305964	0.778094	0.265783
	SFB10	6.98991e-16	1.61556e-16	4.97017e-17	2.82476e-16	7.32446	12.5625	5.50336e-17	6.42685e-17	3.4022e-16	6.48838e-17	6.69767e-17	2.53838e-16	7.59127	2.53713e-18	2.75143e-16	2.75557e-16	0.314798	7.79551e-17	0	1.7569e-16	1.05115e-16	9.56561	8.93908e-17	5.83574e-17	2.58084e-17	0	7.56004e-17	1.95548e-16	3.23894e-16	1.44636e-17	2.88395e-19	1.51882e-16	8.92875	14.998	7.55609e-17	9.05086e-17	1.92064e-16	0	9.05086e-17	3.03679e-16	0	2.73183e-18	0	1.50959e-21	1.22723e-17	3.47134e-17	2.36978e-16	3.69108e-17
	S10-RNase	0	9.97853e-17	7.2382e-17	1.38512e-16	2.96741e-16	1.51067	1.8321e-17	1.7626e-16	5.45188e-17	2.03787e-16	9.53134e-17	1.28743e-16	2.15583	8.79486e-17	1.74368e-16	1.12092e-16	1.28922e-16	1.50406e-16	1.13874e-16	2.44684e-16	2.5513e-16	1.39712	1.54635e-17	4.87651e-18	1.4131e-16	6.2696e-18	1.94043e-16	6.21529e-17	6.84836e-17	6.4272e-18	1.04998e-16	4.23596e-17	2.70811	1.68478	1.37041e-17	1.30828e-16	2.19198e-17	0	1.30828e-16	1.60498e-16	7.48039e-17	3.67542e-16	4.13384e-17	0	1.13715e-16	1.94047e-16	1.67893e-16	2.30617e-20
	S11-RNase	0	1.0653e-16	0	0	4.15657	7.41898	1.15561e-19	0	2.51534e-17	3.64676e-17	3.90544e-17	5.40575e-17	1.12373e-17	4.98344	2.61291e-16	4.72895e-20	5.60607e-17	4.50893e-16	11.3927	3.50749e-20	10.223	2.07096e-18	2.68902e-16	5.50167e-17	9.19569e-17	4.06849e-16	0	0.205558	2.27779e-17	2.32241e-16	1.97234e-16	0.156058	1.18362e-17	1.03497e-16	4.16141e-16	7.24756	0	6.77064e-17	7.24756	0	7.38788	5.50071	5.35184	2.44e-16	2.51126e-17	5.08591e-17	0.284334	5.40056e-16
	S12-RNase	1.48867e-17	5.01468e-18	3.25173e-17	5.02143e-17	1.05732e-16	6.53542e-17	1.07103e-17	5.97422e-18	0	5.32904e-17	5.94551e-17	1.07812e-21	0	1.04473e-16	3.54115e-17	0	0	7.71353e-17	1.52245e-16	1.58224e-17	3.46991e-16	1.52116e-18	3.87282e-17	3.36339e-17	5.40001e-17	4.12762e-18	0	1.35098	9.37241e-18	0	5.70925e-17	3.54995e-17	0	0	0	1.83499e-16	9.72498e-19	1.73728e-17	1.83499e-16	2.14546e-17	1.43871e-16	3.45574e-17	8.4893e-17	9.93037e-18	0	1.41333e-17	2.96899e-17	3.1167e-17
	S13-RNase	0	5.52054e-17	0	0	0	0	0	7.0419e-18	3.8863e-17	0	1.91284e-18	0	2.95552e-19	0	0	0	1.40017e-20	9.81561e-17	0	2.56024e-21	0	0	4.35098e-18	4.07847e-17	3.98222e-18	5.02216e-18	9.77535e-20	0	3.54558e-17	6.18559e-18	2.11588e-17	1.25034e-18	0	2.14214e-17	1.11634e-18	0	6.15459e-18	0	0	0	6.94405e-18	0	0	0	0	0	3.80295e-19	1.23013e-17
	S14-RNase	6.85081e-19	0	4.20655e-17	1.03033e-18	0	0	5.73467e-17	0	1.14717e-17	1.63604e-19	2.88239e-17	0	0	8.07035e-17	0	0	0	2.51185e-17	0	7.86276e-18	0	0	1.02795e-17	0	3.22483e-17	1.10772e-16	5.50143e-17	2.06943e-17	8.57348e-22	6.81226e-20	6.5714e-17	0	3.62894e-17	1.28558e-17	3.21474e-18	6.78813e-19	3.4126e-18	6.79875e-17	6.78813e-19	5.29615e-17	5.18355e-19	8.00031e-17	7.01896e-20	2.84953e-17	0	0	8.4958e-17	1.60079e-18
	S15-RNase	6.51262e-17	8.04957e-17	1.05168e-16	4.04224e-17	3.78223e-16	3.73335e-18	1.78759e-20	1.3125e-16	8.53363e-17	3.39704e-17	4.06534e-17	0.360753	0	4.90178e-17	3.80327e-17	1.67586e-16	3.34666e-17	3.14052e-18	0	1.81385e-16	2.04544e-16	2.72355e-17	3.31068e-18	1.10678e-16	2.79893e-16	6.15516e-17	1.15502e-16	2.15374e-17	1.75371e-17	7.24045e-17	1.91061e-18	6.54584e-17	0	7.32217	0	0	3.43137e-18	0	0	8.82586e-18	2.87491e-18	2.33666e-17	1.43746e-18	9.64186	1.17443e-18	1.19631e-16	2.45896e-16	5.29099e-17
	S16-RNase	1.98967e-19	2.7274e-17	0.190012	4.35196e-17	0.197158	1.17161e-16	0.179915	0.223783	1.59949e-16	0.152295	8.04124e-17	1.00416e-17	0.226715	0.196749	4.51228e-17	0.358303	0.251234	0.130963	0.370722	0.396528	6.29011	2.52088e-17	0.148919	0.233476	0.200016	3.75084e-17	0.200459	1.14111e-16	0.255397	0.428965	0.162131	0.141801	0.168684	0.406877	0.154972	8.02446e-18	7.23778e-17	0.285198	8.02446e-18	0.194093	1.06868e-17	0.188911	1.80948e-17	7.26688	0.357076	6.94413e-19	0.24848	0.154744
	S17-RNase	0	8.35792e-18	9.68523e-17	1.19474e-16	2.21664e-16	6.90585e-17	5.68349e-18	3.88324e-17	3.30813e-18	0	0	1.18324e-17	9.90415e-18	0	0	2.1188e-17	2.10684e-21	0	1.12882e-16	9.25271e-17	8.47887e-17	2.32478e-16	0	9.06716e-17	1.14068e-16	0	1.95729e-16	1.34981e-16	7.26224e-18	0	0.115691	0	6.10202e-17	2.8101e-18	0	1.25398e-16	0	3.28082e-16	1.25398e-16	6.32932e-17	1.22763e-16	5.5561e-17	1.02719e-16	1.08387e-16	0	0	4.55204e-17	5.3764e-17
	S18-RNase	2.23001e-17	0	0	0	2.75323e-17	3.30404e-17	4.22449e-18	0	3.83595e-17	0	0	0	2.02286e-17	0	0	1.84772e-16	2.94708e-21	0	3.221e-19	1.90069e-17	0	6.44706e-17	2.06745e-21	0	1.20801e-17	0	0	0	9.71852e-17	1.22713e-16	0	1.42746e-20	2.64396e-19	1.33042e-16	0	0	0	0	0	0	0	0	0	2.42641e-17	6.37158e-20	8.13306e-17	0.310844	0
	S19-RNase	0.481323	1.4855e-16	0	0	0	0.205703	2.41954e-16	0.343267	0	1.00213e-19	0	2.26655e-16	5.59894e-22	0.165381	2.74149e-17	9.7819e-17	3.96384e-16	0.159329	0.454185	2.56287e-16	0.714296	1.77343e-19	8.45326e-17	0.19693	0.214465	2.97652e-17	1.25495e-17	0	8.02748e-18	0.928958	2.20167e-17	1.26497e-17	0.167814	0.338438	0.190624	2.52704e-16	1.30604e-16	0.213555	2.52704e-16	0	2.37701e-16	1.59409e-16	1.01317e-16	0.405156	3.53913e-16	2.13949e-18	1.58463e-16	0.125096
	S20-RNase	1.57268	1.0253	0.566993	0.520033	0.56848	1.38411	0.841531	1.03833	0.332255	1.59993	0.35272	1.38696	0.310825	0.4769	0.552739	2.21842	2.55114	0.934026	1.99264	2.14475	1.10027	0.732191	0.556207	1.24116	0.850554	0.702115	1.59583	0.861794	0.731758	1.73774	0.463483	0.76687	1.49188	1.75277	0.392897	23.3102	18.2606	23.135	23.3102	0.411666	24.6593	0.923076	0.952682	1.29195	0.669088	0.925293	0.626752	0.448343
	S21-RNase	3.30689	1.33482	1.61302	0.936075	0.844822	2.13666	1.96685	1.76243	1.39856	1.30818	1.70225	2.75321	1.4805	1.35871	1.43534	26.43	3.1245	1.60814	1.71107	4.73246	3.59915	1.69211	1.61649	0.986286	1.74023	1.09818	2.00108	1.68559	1.98987	4.86089	2.19726	1.40926	1.28644	2.86669	1.51802	2.32807	1.757	2.01994	2.32807	1.04971	1.80064	1.4678	2.40909	1.97958	0.92253	2.10889	1.66608	1.5692
	S22-RNase	0.75307	0.269444	0.19268	0.196155	0.200196	0.285845	0.214956	0.293467	0.191277	0.189817	0.142595	14.9865	0.185336	0.37719	0.188963	0.380859	0.34766	0.164467	0.827431	0.457654	0.504234	0.235672	0.191803	0.24435	1.92527e-17	0.165787	0.270939	0.27149	0.269907	0.614042	0.189762	0.235535	0.227204	0.345444	0.18525	0.209535	0.272524	0.262237	0.209535	0.244127	0.293426	0.233111	0.252582	0.445119	1.60902	0.190683	0.304043	0.176007
	S23-RNase	2.74028	2.41133	1.94312	1.2242	1.37389	2.92784	2.05039	2.6434	1.34272	2.38837	1.02243	4.34007	1.01051	1.80427	2.10901	2.39747	2.88563	1.95916	1.90232	5.12101	3.87061	2.22321	1.30552	2.47178	1.79603	1.08702	2.28842	2.42794	1.3519	5.13734	1.88628	1.99346	1.75066	2.35839	1.87442	2.98877	0.620933	2.92715	2.98877	1.07369	2.91067	1.52954	2.21501	4.05816	1.20512	2.1257	3.07714	1.87107
	S23-1_RNase	1.04081e-16	1.4712e-16	1.40549e-16	3.88921e-20	0.209867	3.62041e-16	7.61084e-17	5.37616e-16	7.62463e-17	2.22096e-16	7.32193e-17	2.13641e-16	1.20677e-16	1.00368e-16	1.61519e-17	4.35571e-18	0.293368	1.03138e-16	2.87319e-16	3.79159e-16	2.09371e-16	2.66679e-16	0	1.89439e-18	0.183282	0	2.9394e-17	7.94116e-17	0.23228	2.41565e-16	2.08461e-16	1.92954e-16	1.72788e-16	2.65292e-16	1.24197e-15	4.78968e-17	0	8.46891e-17	4.78968e-17	5.99785e-18	0	3.61811e-17	7.47552e-17	1.83954e-16	4.0443e-16	1.35684e-16	1.39177e-16	7.22104e-17
	S24-RNase	0.344315	3.65786e-17	0	0	6.75798e-17	0.268758	0.204752	0.341556	5.80212e-18	0.188228	0.144584	0.414023	2.15196e-16	3.66305e-17	0.196135	0	1.4029e-16	0.341121	0.476501	7.93562e-17	1.34266e-16	0.22699	6.42847e-17	0.265965	7.36936e-17	0	2.90092e-17	0.253468	1.15954e-15	0.528901	0.162218	2.7507e-17	0.245941	5.05274e-16	2.25024e-15	0.247132	1.749e-16	1.68005e-16	0.247132	0.226416	4.45751e-16	0.253832	0.432437	0.416784	5.3714e-16	1.91867e-16	3.93234e-17	0.176137
	S25-RNase	9.2396e-17	1.05166e-16	9.48012e-17	7.97976e-17	8.53104e-18	0.281679	6.87161e-17	0.26107	9.11471e-17	1.83503e-16	2.71701e-16	6.33862e-18	2.08139e-16	0.171422	9.22089e-17	1.41551e-16	1.39333e-16	1.42556e-16	2.22557e-16	1.32486e-16	1.39381e-16	9.63798e-18	9.47297e-17	9.91761e-18	2.32136e-17	1.28594e-16	8.28875e-17	9.7351e-17	7.39875e-16	8.554e-17	3.82749e-17	5.05524e-17	1.36095e-16	1.70341e-16	3.22276e-18	6.09288e-17	1.41682e-18	2.143e-16	6.09288e-17	3.58212e-17	5.3858e-17	6.65955e-17	1.6634e-16	1.7788e-16	6.7968e-17	1.61039e-16	1.54137e-16	1.79848e-17
	S26-RNase	1.64821e-17	0.193455	0	0.251346	0.165798	2.25034e-17	0	0	4.74255e-17	7.98487e-17	1.62484e-17	3.06271e-16	0	0.188959	3.95076e-16	1.55856e-16	2.10372e-17	0.165638	0.484788	3.28735e-17	6.55479e-18	0.226997	2.68311e-17	2.13625e-17	1.7962e-20	1.34127e-17	3.09117e-18	1.92708e-18	2.02921e-16	9.19097e-17	0	0.190099	0.551252	0	5.31226e-17	0.25222	0	0.266834	0.25222	9.72817e-18	0	0	1.2197e-17	1.60719e-17	2.56649e-20	7.95499e-17	0.275355	0
	S27-RNase	7.80419e-18	0.191993	1.37284e-16	9.82859e-17	0.157794	0.264451	1.19845e-18	0.270195	3.61948e-18	6.69128e-17	0.144904	0.783034	1.29687e-17	2.58381e-17	3.92065e-18	0.360692	6.34325e-17	1.94329e-17	1.63873e-19	2.20729e-16	0	9.87389e-17	1.62841e-17	0.277919	0.19014	0.167098	2.57303e-17	1.56525e-16	8.45913e-17	8.83196e-17	1.39055e-17	1.26204e-17	8.92379e-19	1.14025e-16	1.65852e-16	3.10893e-16	1.40438e-16	4.0671e-16	3.10893e-16	0.200278	2.47129e-16	1.64587e-17	9.71022e-17	0.404788	4.13198e-18	7.37638e-17	0.273298	3.52532e-17
	SFBsany	0.140231	0.100015	0.0849432	0.0963072	0.129056	0.172165	0.112451	0.0994862	0.084786	0.103896	0.105415	0.191632	0.228254	0.13061	0.120923	0.675644	0.167452	0.0857423	0.174323	0.180553	0.181117	0.0718401	0.0960045	0.111382	0.0936731	0.0930296	0.000868538	0.188845	0.133442	0.0559537	0.000497014	0.187446	0.0660552	0.143999	0.0882425	0.133278	0.0866221	0.0976093	0.133278	0.07799	0.115952	0.142368	0.0831122	0.160154	0.000182052	0.126225	0.106867	0.0783621
	Ssany-RNase	4.75414	3.10546	2.0529	2.45268	1.83319	3.63237	2.38911	3.2143	2.09404	2.35296	2.45738	4.82202	1.85563	2.65012	2.32507	4.60927	5.40325	2.19349	4.80116	5.74696	4.35209	3.1704	1.82041	4.12357	2.54189	2.15613	3.20428	3.3892	3.3327	5.6524	2.1801	1.0984	2.48177	3.39584	2.26531	4.22104	0.639424	2.81209	4.22104	1.90836	3.25155	3.01306	2.55274	4.31596	2.2092	1.96905	3.9614	2.12021
	SFBzgl	0.0311115	3.18709e-16	1.60318e-16	2.90397e-16	2.45075e-16	0.000729031	3.22206e-16	4.31556e-17	3.27618e-16	1.15364e-16	1.49879e-16	0.00184593	9.41468	1.9747e-16	2.46652e-16	1.40799e-16	4.86708e-16	2.85518e-16	6.36236e-16	6.8872e-16	4.30484e-16	2.41925e-16	3.35789e-16	4.06563e-16	3.71653e-16	4.36008e-16	3.37058e-16	3.57455e-16	3.82139e-16	0	3.28082e-16	3.00588e-16	1.44817e-17	3.61761e-16	6.50116e-17	4.20403e-16	2.1655e-16	0.0027537	4.20403e-16	2.59579e-16	7.3623e-16	0.00586367	0.127024	7.66086e-16	1.79692e-16	3.299e-16	4.49292e-16	4.12203e-16
	Szgl-RNase	1.30352	0.444942	0.458794	0.872692	0.599455	1.0341	0.273989	0.314229	0.316805	0.451224	0.383394	2.21138	13.7171	0.62087	0.971232	0.712854	0.85646	0.435579	0.431835	1.59327	0.372971	0.556395	0.269412	0.594373	0.497909	0.189036	0.543	0.746325	1.20383	1.43586	0.703104	0.444439	0.472957	8.48549e-18	0.760364	0.57478	0.797632	1.03559	0.57478	0.215432	1.03003	0.804254	0.339459	1.06274	0.344681	0.580824	1.0525	0.248197
	S32-RNase	1.62799	0.790344	0.785165	0.79759	4.03483	7.83812	0.963362	1.33386	0.920923	0.702435	0.664584	2.70367	4.74922	1.1641	0.759673	1.59581e-17	2.19891	0.698413	1.97317	1.87245	2.74744	3.76489	1.27123	1.05328	0.890673	1.16759	1.75651	1.73743	1.06325	2.17529	0.671115	0.772905	5.04238	8.5265	0.733445	1.16534	0.783195	1.26196	1.16534	0.789241	1.21324	0.888778	0.997573	1.74892	0.887314	0.86152	1.08587	0.694372
	S41-RNase	1.30312	0.632627	0.628482	0.638428	2.69948	4.63407	0.771119	1.13792	0.737149	0.562261	0.531964	2.16414	2.81961	0.931799	0.608077	0.647623	1.76011	0.559042	1.57942	1.49879	2.19918	3.1871	1.01755	0.843097	0.712935	0.934594	1.40599	1.39072	0.851072	1.74121	0.537191	0.618669	3.26025	5.40956	0.587083	0.932792	0.626906	1.01013	0.932792	0.631744	0.971136	0.711419	0.798503	1.39992	0.710247	0.6896	0.869184	0.555807
[truncated: 40 more columns]
